# Supplementary material for: Identification of Morus notabilis MADS-box genes and elucidation of the roles of MnMADS33 during endodormancy
Source: PubMed Central journal article supplement (PMC5895635; doi:10.1038/s41598-018-23985-0), 2018-04-11
Supplement: 41598_2018_23985_MOESM1_ESM.pdf [file 41598_2018_23985_MOESM1_ESM.pdf]

1 **Identification of *Morus notabilis* MADS-box genes and elucidation of the roles of *MnMADS33***  
2 **during endodormancy**

3

4 **Yiwei Luo, Hongshun Li, Zhonghuai Xiang, Ningjia He\***

5

6 State Key Laboratory of Silkworm Genome Biology, Southwest University, Beibei, Chongqing 400715,  
7 P. R. China.

8 \*Corresponding author: Ningjia He

9 Tel: +86-23-6825-0797

10 Fax: +86-23-6825-1128

11 Email addresses: hejia@swu.edu.cn

12 **Supplementary File 1**

13 Promoter region of *FLOWERING LOCUS T (FT)* gene of *Morus alba*. GenBank accession number  
14 KU550086. The transcription start site is marked in blue. Four CArG-box-like elements, two of which  
15 are overlapping, are marked in red at the upstream of transcription start site.

16 > Promoter region of *M. alba FLOWERING LOCUS T (FT)* gene

17 GGTGTGGGAAGTGCCTACTCGAATATGGCTGTTCTCCAGTGAGTGCACATCAGAAAATA  
18 ATGACAACACAACAATAAAAAGACAAATTAAGTTGGTTCCAAGTCATGTACCTCTCTC  
19 TAGCGTACAACATACATACATACATACATGTGCACGGCACTAATGAGTGAAGTAGCTA  
20 GTACTTGGCATGTCAAAAATTTTGAATCAATATTCTCTCAAAAGATTGAAATATTAATATATG  
21 GTCTTTAATATACATTACACATTATACACGACACACAGATACATGCACACTGATTAATTTGAC  
22 CAATATTTATGCATTGATCACAACATATATAATGAAGTCTTACTTGGAAATTATTAATGCAATTT  
23 AAGGGCCTATTTAGTTCCTACTATTCGAATTTTTAATTCGAGTTAATATGTGATGTTATGTGAGA  
24 ACTTTTTATTGTAATAAAAAAATTAGATGTAAGTCTTTCTAAGAGCTTTTTATTGTAATAAAA  
25 CTTAAATTGATGAAGTAAACGGGGTCTAAGTGAAGTCTTTCTTTTCTTTTGGTGAATAAGTTAC  
26 GTGACTTATATATTTCAATATTAATTCCCGTGAAAGTATCAAACCTTGAAAAGGCCTCATGGA  
27 CCGACACCTAAGCACGAGGGGCACCCGACTTTACAGTTAGCATGAAAGAGGAAGAAGGCA  
28 TCATCACCATTTTTTTTTTTTTTTTATTTTCTTCTTCGTCGAGGGAAAAGAACGAATGGAATT  
29 TACTAAGAATCTATTGATGTGTACGGCAGCAAAAAGTGAGGATAAGGGCATGCAAAGAAGT  
30 GAAATATATAAATAGCCCTTGGGTCTCTTGAATATGAGCCTCGATATATGTTGGATTCTAAAA  
31 ACTTGTAGTAATATATAGAGCTGTGTTTTTGTATCAAATTAACAATATG

32

33 **Supplementary Tables and Figures**

34

35 **Supplementary Table S1.** List of mulberry MADS-box genes.

36

| <i>MnMADSs</i>  | Gene ID <sup>a</sup> | Location on Scaffold <sup>a</sup> | Start Position | Stop Position <sup>b</sup> | Strand | CDS Length (bp) | Amino Acids Length (aa) | pI    | Mw (kDa) | Gene type <sup>c</sup> |
|-----------------|----------------------|-----------------------------------|----------------|----------------------------|--------|-----------------|-------------------------|-------|----------|------------------------|
| <i>MnMADS1</i>  | Morus008539          | scaffold103                       | 57918          | 64429                      | -      | 642             | 213                     | 8.68  | 24.21    | 1                      |
| <i>MnMADS2</i>  | Morus003736          | scaffold1100                      | 59789          | 60439                      | -      | 651             | 216                     | 7.7   | 24.27    | 3                      |
| <i>MnMADS3</i>  | Morus003737          | scaffold1100                      | 76612          | 77574                      | -      | 963             | 320                     | 9.51  | 35.06    | 3                      |
| <i>MnMADS4</i>  | Morus007697          | scaffold1103                      | 39355          | 47620                      | -      | 840             | 279                     | 6.36  | 31.74    | 1                      |
| <i>MnMADS5</i>  | Morus006491          | scaffold1147                      | 170105         | 174466                     | -      | 975             | 324                     | 6.02  | 36.41    | 1                      |
| <i>MnMADS6</i>  | Morus007949          | scaffold1309                      | 165433         | 168569                     | -      | 777             | 258                     | 6.91  | 29.2     | 1                      |
| <i>MnMADS7</i>  | Morus008448          | scaffold1584                      | 264672         | *                          | -      | 324             | 107                     | 10.09 | 12.22    | 1                      |
| <i>MnMADS8</i>  | Morus002799          | scaffold1640                      | 54554          | 61368                      | -      | 720             | 239                     | 6.56  | 27.85    | 1                      |
| <i>MnMADS9</i>  | Morus002949          | scaffold1731                      | 62938          | 63573                      | +      | 636             | 211                     | 9.46  | 23.1     | 3                      |
| <i>MnMADS10</i> | Morus002950          | scaffold1731                      | 67138          | 67770                      | +      | 633             | 210                     | 9.23  | 23.09    | 3                      |
| <i>MnMADS11</i> | Morus002953          | scaffold1731                      | 82991          | 83629                      | +      | 639             | 212                     | 9.3   | 23.37    | 2                      |
| <i>MnMADS12</i> | Morus007959          | scaffold18                        | 28704          | 30750                      | +      | 612             | 203                     | 6.55  | 23.69    | 1                      |
| <i>MnMADS13</i> | Morus026794          | scaffold184                       | 937088         | 939189                     | +      | 819             | 272                     | 5.93  | 32.11    | 1                      |
| <i>MnMADS14</i> | Morus021528          | scaffold206                       | 202681         | 205612                     | +      | 918             | 305                     | 5.02  | 34.54    | 1                      |
| <i>MnMADS15</i> | Morus010116          | scaffold257                       | 70802          | 73001                      | +      | 468             | 155                     | 9.17  | 17.76    | 1                      |
| <i>MnMADS16</i> | Morus016688          | scaffold261                       | 453135         | *                          | -      | 738             | 245                     | 8.67  | 28.1     | 2                      |
| <i>MnMADS17</i> | Morus016690          | scaffold261                       | 469246         | 478414                     | -      | 678             | 225                     | 9.28  | 25.78    | 1                      |
| <i>MnMADS18</i> | Morus019417          | scaffold262                       | 331346         | 334297                     | +      | 687             | 228                     | 9.04  | 26       | 1                      |
| <i>MnMADS19</i> | Morus019418          | scaffold262                       | 335465         | 337295                     | +      | 558             | 185                     | 7.85  | 21.17    | 0                      |
| <i>MnMADS20</i> | Morus020769          | scaffold271                       | 269809         | 276457                     | +      | 759             | 252                     | 9.26  | 28.63    | 1                      |

|                 |             |              |         |         |   |      |     |      |       |   |
|-----------------|-------------|--------------|---------|---------|---|------|-----|------|-------|---|
| <i>MnMADS21</i> | Morus020772 | scaffold271  | 303424  | *       | - | 660  | 219 | 9.3  | 25.22 | 1 |
| <i>MnMADS22</i> | Morus002481 | scaffold2802 | 71078   | 71709   | + | 600  | 199 | 6.98 | 21.98 | 1 |
| <i>MnMADS23</i> | Morus022655 | scaffold283  | 240922  | 241653  | - | 732  | 243 | 9.58 | 27.93 | 1 |
| <i>MnMADS24</i> | Morus010247 | scaffold286  | 41905   | 44776   | - | 849  | 282 | 6.21 | 32.12 | 1 |
| <i>MnMADS25</i> | Morus016449 | scaffold315  | 375633  | 377147  | + | 1515 | 504 | 4.86 | 54.99 | 1 |
| <i>MnMADS26</i> | Morus021710 | scaffold336  | 738390  | 738959  | - | 570  | 189 | 9.62 | 20.59 | 3 |
| <i>MnMADS27</i> | Morus021711 | scaffold336  | 745933  | 746757  | - | 825  | 274 | 5.25 | 30.12 | 3 |
| <i>MnMADS28</i> | Morus021712 | scaffold336  | 748866  | 749552  | - | 687  | 228 | 6.93 | 25.68 | 3 |
| <i>MnMADS29</i> | Morus002013 | scaffold3543 | 53894   | 54684   | - | 228  | 75  | 9.93 | 8.5   | 1 |
| <i>MnMADS30</i> | Morus003409 | scaffold391  | 67919   | 73344   | - | 720  | 239 | 5.28 | 27.06 | 1 |
| <i>MnMADS31</i> | Morus014296 | scaffold396  | 111914  | 120429  | - | 816  | 271 | 9.65 | 30.71 | 1 |
| <i>MnMADS32</i> | Morus027455 | scaffold45   | 545938  | 546822  | + | 885  | 294 | 8.37 | 33.28 | 1 |
| <i>MnMADS33</i> | Morus009159 | scaffold452  | 46730   | 59370   | + | 756  | 251 | 9.51 | 28.03 | 1 |
| <i>MnMADS34</i> | Morus011637 | scaffold453  | 74236   | 78641   | - | 633  | 210 | 9.62 | 24    | 1 |
| <i>MnMADS35</i> | Morus014795 | scaffold456  | 321592  | 338108  | + | 843  | 280 | 9.25 | 32.09 | 1 |
| <i>MnMADS36</i> | Morus025560 | scaffold485  | 1091892 | 1102285 | - | 345  | 114 | 9.81 | 12.84 | 1 |
| <i>MnMADS37</i> | Morus015670 | scaffold503  | 101899  | 105762  | + | 1086 | 361 | 6.36 | 40.8  | 1 |
| <i>MnMADS38</i> | Morus027089 | scaffold518  | 389838  | 390926  | + | 1089 | 362 | 9.3  | 40.95 | 1 |
| <i>MnMADS39</i> | Morus018312 | scaffold521  | 30736   | 31401   | - | 666  | 221 | 9.89 | 25.31 | 1 |
| <i>MnMADS40</i> | Morus003817 | scaffold553  | 3512    | 5690    | + | 606  | 201 | 8.34 | 23.21 | 2 |
| <i>MnMADS41</i> | Morus003822 | scaffold553  | 30466   | 32878   | + | 543  | 180 | 9.16 | 20.79 | 2 |
| <i>MnMADS42</i> | Morus011377 | scaffold651  | 78123   | 82385   | - | 555  | 184 | 8.77 | 21.46 | 3 |
| <i>MnMADS43</i> | Morus011378 | scaffold651  | 91533   | 103328  | - | 687  | 228 | 5.16 | 25.29 | 3 |
| <i>MnMADS44</i> | Morus017454 | scaffold689  | 157053  | 163801  | - | 735  | 244 | 8.8  | 27.83 | 1 |
| <i>MnMADS45</i> | Morus026460 | scaffold73   | 440680  | 450503  | + | 807  | 268 | 8.12 | 30.26 | 1 |
| <i>MnMADS46</i> | Morus026461 | scaffold73   | 457529  | 466497  | + | 753  | 250 | 8.5  | 29.08 | 1 |

|                 |             |             |        |        |   |      |     |      |       |   |
|-----------------|-------------|-------------|--------|--------|---|------|-----|------|-------|---|
| <i>MnMADS47</i> | Morus023824 | scaffold75  | 237899 | 238675 | + | 777  | 258 | 9.55 | 29.05 | 1 |
| <i>MnMADS48</i> | Morus016912 | scaffold758 | 241600 | 243129 | - | 1530 | 509 | 5.21 | 55.11 | 1 |
| <i>MnMADS49</i> | Morus010768 | scaffold784 | 80590  | 81828  | + | 1239 | 412 | 6.28 | 47.96 | 1 |
| <i>MnMADS50</i> | Morus012228 | scaffold83  | 6460   | *      | - | 573  | 190 | 9.78 | 21.95 | 1 |
| <i>MnMADS51</i> | Morus023143 | scaffold87  | 204156 | *      | + | 651  | 216 | 9.66 | 24.91 | 1 |
| <i>MnMADS52</i> | Morus018170 | scaffold948 | 298731 | *      | - | 339  | 112 | 9.74 | 12.91 | 1 |
| <i>MnMADS53</i> | Morus018171 | scaffold948 | 321413 | 326225 | - | 747  | 248 | 8.95 | 28.52 | 1 |
| <i>MnMADS54</i> | Morus018510 | scaffold96  | 361921 | 365205 | - | 729  | 242 | 6.53 | 27.58 | 1 |

37

38 <sup>a</sup> Accession numbers were from <http://morus.swu.edu.cn/morusdb/>.

39 <sup>b</sup> The cDNA of truncated genes, *MnMADS7/16/21/50/51/52*, and the stop positions on the scaffold were unknown and indicated with an asterisk.

40 <sup>c</sup> Gene types were determined using MCSanX and the 0-3 correspond to singleton, dispersed (modes other than segmental, tandem, and proximal), proximal (in nearby

41 chromosomal regions, but not adjacent), tandem (consecutive repeat), and whole genome segmental duplications (collinear genes in collinear blocks), respectively.

42 **Supplementary Table S2.** Duplication types in the eight *MnMADS* pairs.

43

| Paralogous pairs         | Ka   | Ks   | Ka/Ks | Purifying selection | Duplicate genes type |
|--------------------------|------|------|-------|---------------------|----------------------|
| <i>MnMADS16/MnMADS46</i> | 0.08 | 2.94 | 0.03  | Yes                 | WGD/segmental        |
| <i>MnMADS42/MnMADS43</i> | 0.05 | 0.69 | 0.08  | Yes                 | Tandem               |
| <i>MnMADS45/MnMADS53</i> | 0.12 | 1.53 | 0.08  | Yes                 | WGD/segmental        |
| <i>MnMADS17/MnMADS45</i> | 0.15 | 1.81 | 0.08  | Yes                 | WGD/segmental        |
| <i>MnMADS27/MnMADS28</i> | 1.89 | 3.08 | 0.61  | Yes                 | Tandem               |
| <i>MnMADS9/MnMADS10</i>  | 0.02 | 0.02 | 0.88  | Yes                 | Tandem               |
| <i>MnMADS26/MnMADS27</i> | 1.81 | 1.41 | 1.28  | No                  | Tandem               |
| <i>MnMADS2/MnMADS3</i>   | 2.78 | 1.77 | 1.57  | No                  | Tandem               |

44

45

46  
47

**Supplementary Table S3.** RNA-sequencing data for *MnMADS*s expression levels.

| Gene ID         | Root  | Leaf  | Bark   | Winter bud | Male flower |
|-----------------|-------|-------|--------|------------|-------------|
| <i>MnMADS1</i>  | 18.79 | 13.9  | 44.2   | 19.88      | 3.57        |
| <i>MnMADS4</i>  | 0     | 4.84  | 10.54  | 2.29       | 1.22        |
| <i>MnMADS5</i>  | 6.73  | 14.63 | 24.8   | 36.87      | 37.86       |
| <i>MnMADS6</i>  | 0     | 0.08  | 0      | 1.41       | 0.31        |
| <i>MnMADS7</i>  | 0.25  | 2.06  | 3.59   | 1.27       | 0.56        |
| <i>MnMADS8</i>  | 0.46  | 0     | 89.92  | 32.4       | 35.1        |
| <i>MnMADS12</i> | 0     | 1.09  | 0.33   | 75.55      | 4.93        |
| <i>MnMADS13</i> | 0.2   | 0     | 0.12   | 5.19       | 0.15        |
| <i>MnMADS14</i> | 0     | 0.66  | 0.11   | 0          | 1.91        |
| <i>MnMADS15</i> | 0.35  | 0     | 147.41 | 43.98      | 9.02        |
| <i>MnMADS16</i> | 1.98  | 9.09  | 18.08  | 54.35      | 24.47       |
| <i>MnMADS17</i> | 0.73  | 0     | 2.16   | 34.2       | 233.41      |
| <i>MnMADS18</i> | 6.93  | 3.36  | 2.06   | 68.7       | 24.93       |
| <i>MnMADS19</i> | 8.53  | 0.54  | 6.35   | 58.77      | 36.64       |
| <i>MnMADS20</i> | 0.22  | 0.64  | 3.2    | 33.8       | 76.2        |
| <i>MnMADS21</i> | 11.25 | 33.28 | 59.95  | 10.67      | 26.13       |
| <i>MnMADS23</i> | 0     | 0     | 0      | 0          | 0.08        |
| <i>MnMADS24</i> | 0     | 0     | 0      | 0          | 1.49        |
| <i>MnMADS25</i> | 1.08  | 0.84  | 0.2    | 0          | 0.48        |
| <i>MnMADS27</i> | 0     | 0     | 0.12   | 0          | 2.85        |
| <i>MnMADS29</i> | 0     | 0     | 0      | 0          | 5.03        |
| <i>MnMADS30</i> | 0     | 0.34  | 0.42   | 0          | 0.08        |
| <i>MnMADS31</i> | 0.5   | 0.3   | 0.56   | 0          | 0.15        |
| <i>MnMADS32</i> | 0.74  | 0.27  | 0      | 0.31       | 0.2         |
| <i>MnMADS33</i> | 1.63  | 4.18  | 19.07  | 88.75      | 15.48       |
| <i>MnMADS34</i> | 0     | 0     | 0      | 0.22       | 106.04      |
| <i>MnMADS35</i> | 9.25  | 0     | 0.66   | 0.33       | 0.79        |
| <i>MnMADS36</i> | 3.33  | 0.35  | 0.73   | 0          | 0.87        |
| <i>MnMADS37</i> | 2.12  | 6.48  | 7.41   | 3.92       | 10.83       |
| <i>MnMADS39</i> | 0     | 0.55  | 0      | 0.41       | 0           |
| <i>MnMADS40</i> | 0     | 0.4   | 0      | 97.13      | 0           |
| <i>MnMADS41</i> | 0     | 0.11  | 0.09   | 38.91      | 6.78        |
| <i>MnMADS42</i> | 1.18  | 14.99 | 17.86  | 1.98       | 1.63        |
| <i>MnMADS43</i> | 5.26  | 19.26 | 18.77  | 1.8        | 5.53        |
| <i>MnMADS44</i> | 0     | 0     | 0      | 120.97     | 535.32      |
| <i>MnMADS45</i> | 0     | 0     | 1.5    | 39.78      | 99.17       |
| <i>MnMADS46</i> | 0.21  | 0.23  | 0.19   | 54.64      | 304.69      |
| <i>MnMADS47</i> | 0     | 0     | 0.13   | 0          | 0           |
| <i>MnMADS49</i> | 0.13  | 0.39  | 0.16   | 0.44       | 0           |
| <i>MnMADS50</i> | 0     | 8.84  | 7.95   | 10.31      | 1.42        |
| <i>MnMADS51</i> | 13.86 | 24.28 | 10.34  | 2.44       | 3.22        |

|                 |      |       |      |       |        |
|-----------------|------|-------|------|-------|--------|
| <i>MnMADS52</i> | 1.93 | 11.12 | 9.5  | 2.58  | 16.14  |
| <i>MnMADS53</i> | 0.22 | 0.16  | 0.27 | 53.08 | 272.48 |
| <i>MnMADS54</i> | 0    | 0     | 0    | 0     | 0.99   |

---

48



**Supplementary Table S4.** Expression levels of *MnMADS*s based on qRT-PCR analyses.

|          | Inflorescence initiation |      |        |       |         |       | Dormancy and Dormancy release |       |        |       |        |      |         | Infructescence |          |        |           |         |            |        |
|----------|--------------------------|------|--------|-------|---------|-------|-------------------------------|-------|--------|-------|--------|------|---------|----------------|----------|--------|-----------|---------|------------|--------|
|          | Bud I                    |      | Bud II |       | Bud III |       | Bud IV                        |       | Bud V  |       | Bud VI |      | Bud VII |                | Catkin I |        | Catkin II |         | Catkin III |        |
|          | Mean                     | SD   | Mean   | SD    | Mean    | SD    | Mean                          | SD    | Mean   | SD    | Mean   | SD   | Mean    | SD             | Mean     | SD     | Mean      | SD      | Mean       | SD     |
| MnMADS1  | 12.72                    | 0.31 | 166.13 | 4.85  | 39.17   | 20.02 | 156.41                        | 13.66 | 364.16 | 41.29 | 264.5  | 38.4 | 159.13  | 3.26           | 36.48    | 3.27   | 23.97     | 4.76    | 8.39       | 0.51   |
| MnMADS4  | 0                        | 0    | 0      | 0     | 0       | 0     | 0.06                          | 0.03  | 0.05   | 0.01  | 0.16   | 0.05 | 0.09    | 0.04           | 0        | 0      | 0         | 0       | 0          | 0      |
| MnMADS5  | 0.27                     | 0.18 | 6.37   | 0.46  | 1.05    | 0.2   | 13.79                         | 2.55  | 18.46  | 4.92  | 9.01   | 1.36 | 5.56    | 0.86           | 7.4      | 1.17   | 14.26     | 0.71    | 9.97       | 0.99   |
| MnMADS7  | 1.28                     | 0.23 | 6.29   | 0.08  | 4.77    | 0.32  | 1.66                          | 0.28  | 1.94   | 0.22  | 3.29   | 0.28 | 3.07    | 0.54           | 6.68     | 0.3    | 5.86      | 0.76    | 0.93       | 0.06   |
| MnMADS8  | 3.42                     | 0.17 | 19.93  | 2.81  | 2.28    | 0.67  | 18.25                         | 4.06  | 12.65  | 1.12  | 42.67  | 4.2  | 75.82   | 7.73           | 202.78   | 55.39  | 190.31    | 30.82   | 35.17      | 1.81   |
| MnMADS9  | 0.74                     | 0.07 | 4.47   | 2.49  | 29.32   | 2.55  | 1.39                          | 0.31  | 1.08   | 0.54  | 0.26   | 0.06 | 0.08    | 0.06           | 1.01     | 0.18   | 2.26      | 0.3     | 6.85       | 0.23   |
| MnMADS12 | 2.49                     | 0.37 | 4.77   | 0.32  | 5.11    | 1.92  | 0.29                          | 0.09  | 0.36   | 0.33  | 2.47   | 0.76 | 5.2     | 2.11           | 5.78     | 0.19   | 7.95      | 1.56    | 6.98       | 0.38   |
| MnMADS13 | 0                        | 0    | 65.39  | 5.61  | 0       | 0     | 1.14                          | 0.7   | 0.44   | 0.25  | 1.54   | 0.1  | 1.74    | 0.54           | 1.35     | 0.09   | 2.25      | 0.17    | 1          | 0.08   |
| MnMADS14 | 4.64                     | 0.16 | 2.94   | 0.29  | 3.26    | 0.36  | 0.11                          | 0     | 0.02   | 0.02  | 0.08   | 0.05 | 1.22    | 0.41           | 22.56    | 0.32   | 25.99     | 6.32    | 7.79       | 0.09   |
| MnMADS16 | 10.27                    | 1.37 | 12.65  | 1.49  | 2.49    | 0.37  | 32.45                         | 4.67  | 48.45  | 8.33  | 25.69  | 2.54 | 10.63   | 0.87           | 46.54    | 1.66   | 47.2      | 17.61   | 95.92      | 62.89  |
| MnMADS17 | 0.14                     | 0.01 | 2.49   | 0.37  | 0       | 0     | 49.47                         | 1.63  | 31.83  | 3.94  | 41.3   | 1.07 | 108.85  | 2.52           | 735.41   | 451.75 | 1927.84   | 1350.32 | 2160.74    | 881.39 |
| MnMADS18 | 1.12                     | 0.4  | 1.61   | 0.17  | 0.64    | 0.44  | 12.39                         | 0.61  | 28.33  | 4.47  | 26.7   | 1.79 | 20.03   | 2.2            | 6.29     | 0.08   | 11.18     | 1.17    | 1.65       | 0.01   |
| MnMADS19 | 13.73                    | 0.9  | 102.67 | 62.16 | 67.47   | 8.4   | 30.68                         | 2.61  | 28.09  | 3.4   | 56.96  | 6.27 | 67.02   | 7.81           | 208.77   | 24.23  | 395.17    | 2.16    | 981.49     | 176.92 |
| MnMADS20 | 0.05                     | 0.04 | 155.8  | 11.96 | 0.14    | 0.01  | 104.46                        | 20.84 | 174.34 | 65.36 | 364.39 | 7.82 | 289.81  | 17.56          | 0        | 0      | 0         | 0       | 0          | 0      |
| MnMADS22 | 0.4                      | 0.13 | 0.03   | 0.01  | 2.47    | 0.76  | 0.19                          | 0.05  | 0.06   | 0.03  | 0.07   | 0.01 | 0.02    | 0.01           | 0.06     | 0.05   | 0.35      | 0.1     | 3.78       | 0.84   |
| MnMADS24 | 0.64                     | 0.44 | 1.61   | 0.17  | 18.37   | 0.67  | 0.53                          | 0.2   | 0.47   | 0.1   | 0.4    | 0.11 | 0.16    | 0.04           | 0.76     | 0.05   | 1.87      | 0.38    | 19.24      | 1.61   |
| MnMADS25 | 0.21                     | 0.06 | 1.28   | 0.23  | 1.87    | 0.71  | 0.27                          | 0.1   | 0.56   | 0.2   | 0.36   | 0.07 | 0.36    | 0.14           | 0.51     | 0.01   | 0.49      | 0.02    | 0.28       | 0.14   |
| MnMADS26 | 0.08                     | 0.01 | 1.02   | 0.09  | 4.45    | 0.45  | 0.11                          | 0.02  | 0.26   | 0.03  | 0.12   | 0.04 | 0.39    | 0.06           | 0.47     | 0.05   | 0.69      | 0.14    | 0.78       | 0.1    |
| MnMADS28 | 0                        | 0    | 0      | 0     | 0.81    | 0.24  | 0.15                          | 0.06  | 0.16   | 0.05  | 0.25   | 0.1  | 0.16    | 0.05           | 0.25     | 0.1    | 1.01      | 0.2     | 1.51       | 0.13   |
| MnMADS31 | 0                        | 0    | 0      | 0     | 0       | 0     | 0                             | 0     | 0.05   | 0.04  | 2.28   | 0.67 | 9.61    | 0.77           | 6.06     | 0.15   | 10.31     | 3.22    | 1.3        | 0.3    |
| MnMADS32 | 0.44                     | 0.12 | 0.03   | 0     | 0.71    | 0.28  | 0.06                          | 0.03  | 0.22   | 0.13  | 0.55   | 0.15 | 0.86    | 0.06           | 0.37     | 0.06   | 0.58      | 0.02    | 1.37       | 0.04   |

|          |       |      |       |       |       |       |       |       |        |       |       |       |        |       |         |        |         |        |         |         |
|----------|-------|------|-------|-------|-------|-------|-------|-------|--------|-------|-------|-------|--------|-------|---------|--------|---------|--------|---------|---------|
| MnMADS33 | 29.4  | 0.31 | 34.41 | 20.02 | 35.34 | 7.18  | 86.64 | 5.13  | 97.56  | 18.75 | 22.32 | 3.39  | 10     | 0.54  | 7.49    | 1.02   | 14.47   | 1.56   | 162.33  | 5.12    |
| MnMADS34 | 3.23  | 0.48 | 4.47  | 2.49  | 6.68  | 0.3   | 3.32  | 0.22  | 1.47   | 0.36  | 44.11 | 0.64  | 328.42 | 8.96  | 1838.25 | 132.8  | 1485.84 | 267.02 | 1202.88 | 89.25   |
| MnMADS35 | 6.98  | 0.38 | 63.24 | 28.83 | 74.77 | 3.91  | 8.56  | 0.69  | 4.57   | 1.3   | 1.64  | 0.11  | 0.7    | 0.05  | 0.71    | 0.04   | 0.28    | 0.14   | 2.08    | 0.24    |
| MnMADS37 | 9.34  | 0.35 | 25.69 | 6.4   | 14.69 | 4.49  | 51.84 | 3.16  | 128.61 | 44.03 | 80.16 | 10.77 | 119.2  | 34.94 | 38.69   | 10.14  | 24.82   | 3.74   | 21.54   | 1.12    |
| MnMADS38 | 0     | 0    | 0     | 0     | 0     | 0     | 0.08  | 0.01  | 0      | 0     | 0     | 0     | 0.15   | 0.06  | 1.01    | 0.18   | 1.64    | 0.1    | 6055.42 | 1008.86 |
| MnMADS39 | 1.45  | 0.35 | 2.25  | 0.54  | 7.49  | 1.02  | 0.48  | 0.25  | 1.43   | 0.65  | 1.01  | 0.25  | 10.81  | 1.78  | 0.21    | 0.06   | 1.05    | 0.2    | 1000.11 | 218.05  |
| MnMADS41 | 0     | 0    | 9.37  | 1.3   | 0     | 0     | 2.11  | 0.55  | 2.33   | 0.38  | 10.04 | 2.77  | 6.29   | 0.52  | 11.44   | 2.54   | 49.88   | 26.86  | 21.04   | 3.8     |
| MnMADS42 | 12.05 | 1.66 | 20.42 | 3.33  | 11.95 | 12.56 | 5.48  | 1.06  | 3.74   | 0.86  | 6.65  | 1.28  | 5.17   | 0.88  | 2.26    | 0.3    | 8.41    | 1.24   | 0.62    | 0.05    |
| MnMADS43 | 13.45 | 1.37 | 14.74 | 1.9   | 9.75  | 2.26  | 22.27 | 7.42  | 10.71  | 1.98  | 14.91 | 3.22  | 11.94  | 1.7   | 19.21   | 5.88   | 7.46    | 0.17   | 2.25    | 0.17    |
| MnMADS44 | 0.05  | 0.04 | 2.93  | 0.17  | 1.05  | 0.2   | 26.65 | 1.88  | 22.22  | 2.87  | 23.96 | 3.24  | 95.27  | 4.57  | 732.89  | 183.32 | 918.13  | 27.68  | 2352.17 | 63.65   |
| MnMADS45 | 9.97  | 0.99 | 98.18 | 18.13 | 26.01 | 6.32  | 36.3  | 1.84  | 37.6   | 4.06  | 35.92 | 0.85  | 43.94  | 1.56  | 761.26  | 201.41 | 774.66  | 61.17  | 981.49  | 176.92  |
| MnMADS46 | 5.27  | 1.23 | 38.97 | 15.35 | 29.32 | 2.55  | 9.46  | 2.63  | 13.36  | 1.5   | 71.61 | 2.9   | 120.85 | 24.76 | 1121.94 | 75.16  | 727.1   | 327.61 | 0       | 0       |
| MnMADS49 | 0.15  | 0.04 | 0.27  | 0.18  | 2.33  | 0.1   | 0.54  | 0.08  | 0.44   | 0.12  | 0.27  | 0.18  | 0.08   | 0.02  | 0.69    | 0.03   | 0.49    | 0.02   | 0.51    | 0.01    |
| MnMADS50 | 21.28 | 2.18 | 88.47 | 32.75 | 131.3 | 35.83 | 15.76 | 0.66  | 26.69  | 2.03  | 13.12 | 0.87  | 7.85   | 0.54  | 2.08    | 0.24   | 2.33    | 0.15   | 1.08    | 0.12    |
| MnMADS51 | 5.2   | 2.11 | 4.64  | 0.16  | 0.71  | 0.28  | 4.29  | 0.7   | 3.37   | 0.66  | 2.39  | 0.15  | 1.64   | 0.1   | 8.39    | 0.51   | 8.44    | 1.61   | 6       | 3.48    |
| MnMADS52 | 22.5  | 0.57 | 25.03 | 21.65 | 45.98 | 1.84  | 20.29 | 1.71  | 29.68  | 3.1   | 18.28 | 2.35  | 9.39   | 0.97  | 77.73   | 2.97   | 47.2    | 17.61  | 6.01    | 0.35    |
| MnMADS53 | 0.08  | 0.02 | 18.37 | 0.67  | 0.02  | 0     | 74.43 | 17.12 | 18.09  | 2.51  | 72.33 | 12.14 | 197.23 | 34.58 | 633.52  | 152.73 | 849.28  | 15.54  | 3406.82 | 312.26  |
| MnMADS54 | 0.25  | 0.1  | 1.59  | 0.63  | 11.18 | 1.17  | 0.23  | 0.16  | 0.16   | 0.04  | 0.09  | 0.03  | 1.35   | 0.16  | 79.31   | 1.15   | 252.42  | 19.02  | 10.59   | 0.72    |

52 **Supplementary Table S5.** List of sequences used in the phylogenetic analyses.

53

| Species                        | Gene name    | Identifier   |
|--------------------------------|--------------|--------------|
| <i>Actinidia deliciosa</i>     | AdFLC        | FG406624.1   |
| <i>Alnus glutinosa</i>         | AgFLC        | FQ352883     |
| <i>Arabidopsis thaliana</i>    | FLC          | AY850002.1   |
| <i>Arabidopsis thaliana</i>    | MAF1         | NM202431     |
| <i>Arabidopsis thaliana</i>    | MAF2         | AY231441     |
| <i>Arabidopsis thaliana</i>    | MAF3         | AY231445     |
| <i>Arabidopsis thaliana</i>    | MAF4         | AY231450     |
| <i>Arabidopsis thaliana</i>    | MAF5         | AY231455     |
| <i>Arabis alpina</i>           | PEP1         | FJ755930     |
| <i>Avena barbata</i>           | AbFLC        | GR360557     |
| <i>Beta vulgaris</i>           | BvFLC        | DQ189210     |
| <i>Brachypodium distachyon</i> | Bradi2g59120 | Bradi2g59120 |
| <i>Brassica juncea</i>         | BjFLC        | KJ489426.1   |
| <i>Brassica napus</i>          | BnaFLC       | JX901141.1   |
| <i>Brassica nigra</i>          | BniFLC       | KJ733745.1   |
| <i>Brassica oleracea</i>       | BoFLC        | KF797913.1   |
| <i>Brassica rapa</i>           | BrFLC1       | EF138603     |
| <i>Brassica rapa</i>           | BrFLC2       | FJ936112     |
| <i>Camellia sinensis</i>       | CsFLC        | GH454305     |
| <i>Cardamine flexuosa</i>      | CfFLC        | KC618318.1   |
| <i>Carthamus tinctorius</i>    | CtFLC        | EL510509     |
| <i>Castanea mollissima</i>     | CmFLC        | GO921333     |
| <i>Centuarea solstitialis</i>  | CsFLC        | EH776903     |
| <i>Cichorium intybus</i>       | CeFLC        | EL354164     |
| <i>Cichorium intybus</i>       | CiFLC1       | EH709586     |
| <i>Cichorium intybus</i>       | CiFLC2       | EH704206     |
| <i>Coffea arabica</i>          | CaFLC        | HQ845334     |
| <i>Cyclamen persicum</i>       | CpMADS3      | AB600233.1   |
| <i>Cynodon dactylon</i>        | CdFLC        | ES295415.1   |
| <i>Dactylis glomerata</i>      | DgFLC        | HO164248     |
| <i>Dimocarpus longan</i>       | DlFLC        | KJ480952.1   |
| <i>Diplotaxis tenuifolia</i>   | DtFLC        | KX148480.1   |
| <i>Eucalyptus grandis</i>      | EgFLC        | HS058521.1   |
| <i>Eustoma exaltatum</i>       | EgFLC1       | AB565507     |
| <i>Eutrema wasabi</i>          | EwFLC        | HM639741.1   |
| <i>Fagus sylvatica</i>         | FsFLC        | FR606704     |
| <i>Glycine max</i>             | GmFLC1       | AI900863     |
| <i>Glycine max</i>             | GmFLC2       | FG995813.1   |
| <i>Glycyrrhiza uralensis</i>   | GuFLC        | FS240134     |
| <i>Helianthus annuus</i>       | HaFLC        | GE519513     |
| <i>Hordeum vulgare</i>         | ODDSOC1      | HM130525     |

|                                      |                   |                   |
|--------------------------------------|-------------------|-------------------|
| <i>Hordeum vulgare</i>               | ODDSOC2           | HM130526.1        |
| <i>Ipomoea batatas</i>               | IbFLC             | EE880701          |
| <i>Juglans regia</i>                 | JrFLC             | KF729795.1        |
| <i>Lactuca serriola</i>              | LcFLC             | DW120350          |
| <i>Malus domestica</i>               | MdFLC             | EB140370          |
| <i>Mesembryanthemum crystallinum</i> | McFLC             | BF479182          |
| <i>Mimulus guttatus</i>              | mgv1a014464m      | mgv1a014464m      |
| <i>Mimulus guttatus</i>              | mgv1a014491m      | mgv1a014491m      |
| <i>Mimulus guttatus</i>              | mgv1a014510m      | mgv1a014510m      |
| <i>Musa paradisiaca</i>              | MpFLC             | FL658504          |
| <i>Nicotiana tabacum</i>             | NtaFLC            | EB443157          |
| <i>Oryza sativa</i>                  | OsMADS512         | HC084629          |
| <i>Panicum virgatum</i>              | PvFLC1            | FL799640          |
| <i>Panicum virgatum</i>              | PvFLC2            | FL926484.1        |
| <i>Petunia hybrida</i>               | PhMADS15          | AY370529          |
| <i>Poncirus trifoliata</i>           | PtFLC             | EY817319.1        |
| <i>Populus trichocarpa</i>           | PtFLC             | XM_002303748.1    |
| <i>Pyrus pyrifolia</i>               | PpFLC             | AB524589          |
| <i>Quercus robur</i>                 | QrFLC             | FR627327.1        |
| <i>Raphanus sativus</i>              | RsFLC             | AY273160          |
| <i>Saccharum hybrid</i>              | ShFLC             | CA295053          |
| <i>Setaria italica</i>               | Si014540m         | Si014540m         |
| <i>Sinapis alba</i>                  | SaFLC             | EF542803.1        |
| <i>Solanum lycopersicum</i>          | SIFLC             | AK323974          |
| <i>Solanum tuberosum</i>             | StFLC             | BG596731          |
| <i>Sorghum bicolor</i>               | SbFLC1            | Sb07g026180       |
| <i>Sorghum bicolor</i>               | SbFLC2            | Sb03g044170       |
| <i>Taihangia rupestris</i>           | TrMADS3           | EF469601          |
| <i>Taraxacum officinale</i>          | ToFLC             | DY804936          |
| <i>Thellungiella halophila</i>       | ThFLC             | AY957537.1        |
| <i>Theobroma cacao</i>               | TcFLC             | CU608380          |
| <i>Triticum aestivum</i>             | MADS2             | DQ534490.1        |
| <i>Triticum aestivum</i>             | TaAGL12           | AB007505.1        |
| <i>Triticum aestivum</i>             | TaAGL33           | DQ512366.1        |
| <i>Triticum aestivum</i>             | TaAGL41           | DQ512357          |
| <i>Triticum aestivum</i>             | TaAGL42           | DQ512358.1        |
| <i>Vitis vinifera</i>                | GSVIVG01033067001 | GSVIVG01033067001 |
| <i>Zea mays</i>                      | ZMM22             | GRMZM2G052045     |
| <i>Zea mays</i>                      | ZmMADS54          | GRMZM2G320549     |
| <i>Zea mays</i>                      | ZmMADS77          | GRMZM2G098986     |

55 **Supplementary Table S6.** Primers used for quantitative real-time PCR (qRT-PCR).

56

| Gene Name       | Forward Primer (5'-3')    | Reverse Primer (5'-3')     |
|-----------------|---------------------------|----------------------------|
| <i>MnMADS1</i>  | GCTGGAGTTGATTCGGATAACG    | GCCCCAACTTGAGAGATGTGTC     |
| <i>MnMADS4</i>  | GCCTCAAGCTAAGGCAGATG      | GTGGTCGCAGACTGATCTGA       |
| <i>MnMADS5</i>  | CGCAACTGATAGGACTGCAA      | CATCAGATGCTGCTTTCCAA       |
| <i>MnMADS7</i>  | AGTCGCTCTCATTGTCTTCTCCG   | GTGCTCAACCTTGCCTTTCTCA     |
| <i>MnMADS8</i>  | AGCCGTGGAAAGCTCTATGA      | TTCAGTTTTGGAATCTCCCG       |
| <i>MnMADS9</i>  | CGCCAGCACTTCTACTAATGTTGT  | ATCTTCGCTTTCTTCTTCTCCTCC   |
| <i>MnMADS12</i> | AGATGATTGAGAACCGGACG      | GCTCTCTGATACCGGTCGAG       |
| <i>MnMADS13</i> | CTACCAGGAGCTATGCCAGC      | TCCGCCATAGATTCATCCTC       |
| <i>MnMADS14</i> | TCAAATGGCAGAGGAGCAGA      | GGTACTCCGGGTGGTTCGTA       |
| <i>MnMADS16</i> | CGTCTTCTCCACCAAAGGAA      | TTGAGCTTTGCATGTTCCAG       |
| <i>MnMADS17</i> | TCTTTGTGATGCTGAAGTTGCG    | AGGTTGGGTAGCCTCCAGTGAA     |
| <i>MnMADS18</i> | TGTACCAAAGGACCTCAGG       | CTGACTGATCTGCATCCGAA       |
| <i>MnMADS19</i> | TTGACACCGAAACCAAATCA      | TGTATGAGCTGCCGATTCAG       |
| <i>MnMADS20</i> | AGAGCTCTCTGCTCTGCG        | CTGTGTTTCGCGCTCAATAA       |
| <i>MnMADS22</i> | AGAAGGAGCGATGCGAGATGG     | TTCAGCAGCGACATAAACGGC      |
| <i>MnMADS24</i> | AATGCCCAAGACCAAGTACG      | GCCGTTCTGCTTGAAAAGTC       |
| <i>MnMADS25</i> | GGGTGGCAACTGTGCTTATT      | AAACGACGAAGAAGAGCCAA       |
| <i>MnMADS26</i> | GAGTCCGTCGCTGACAGTTTCTA   | GCCGCAGCATTGTTCTTCTTATTC   |
| <i>MnMADS28</i> | AGGGGAAAACAAAAGATTGAGATAA | CCATAGAAGGTTGAGCAAAAAGAGAA |
| <i>MnMADS31</i> | AGGAGGATTGAGAATCCGGT      | TTCTGCAAAGATTGCGTTTG       |
| <i>MnMADS32</i> | GAGAGTGGGAGGCGTGTAAG      | ATGTCGTTTTGTGGACCCAT       |
| <i>MnMADS33</i> | GGCAGCGGCAACCTCTAC        | AGCACTCCGGAATCCACTAATA     |
| <i>MnMADS34</i> | GATAGCTCAAGTGCAAGCTCCA    | GTTCTTTGACGGAAAGCGAACT     |

|                   |                             |                           |
|-------------------|-----------------------------|---------------------------|
| <i>MnMADS35</i>   | GGTGTCCGTACCAAGAAGGA        | AATTGGAGATTGACGGATGC      |
| <i>MnMADS37</i>   | CCTCATTTGGGAGTTATTCTGGTTA   | TAGCACATTCAGATTGTAAGGCACG |
| <i>MnMADS38</i>   | TGGGATGTTGATGGAGAACA        | TTCAGCACATTCATCGGGTA      |
| <i>MnMADS39</i>   | CCAGGTTCAAGAACATGCCT        | TTGGAACATGATCCGAGTGA      |
| <i>MnMADS41</i>   | GGTTTCGCTTATTATCTACGGTCCC   | TCTTTTTTGGTCATTTCAATCTCAG |
| <i>MnMADS42</i>   | TCTTTGTGATGCTGAGATTGCT      | ACGCCTTAGTTCAGTCGTCTTC    |
| <i>MnMADS43</i>   | AGGGCTTTTCAAGAAGGCTC        | GCCTTTCAAGAATTTGCTGC      |
| <i>MnMADS44</i>   | GAAACAAAGGCTGGTGGAAAGGATAC  | TAAGGTGGGTTACACTCTAAGGGG  |
| <i>MnMADS45</i>   | GCATACACCCACCACCAATCTCA     | CTGTGCCACCTTCCACATTAACC   |
| <i>MnMADS46</i>   | AATCGGCAGGTAACTTTTTCCAA     | TAACAGCAACTTCAGCGTCACAC   |
| <i>MnMADS49</i>   | CGTTTATGAGCCATTACACCC       | CTTTGAAGAAGTCGGCGATGTC    |
| <i>MnMADS50</i>   | AAGCGAATCGAGGACAAGCA        | CTAAACTTCCGGAGCTGGGG      |
| <i>MnMADS51</i>   | CGGTTCTCTGTGATGCTGAA        | TGCTGATCACGATCTTCTGG      |
| <i>MnMADS52</i>   | AACAAGATCAGCAGGCAGGT        | TAATCAAACCAACATGGGCA      |
| <i>MnMADS53</i>   | TTGAGCGTCAACTTGAGACG        | GAATATCAGCCCCTGGGAAT      |
| <i>MnMADS54</i>   | CAAAACCACAAGGCAAGTCACC      | GGCATCACAAAGCACAGAGAGC    |
| <i>MnCYP707A4</i> | CATCGGAGTTCTGTTTGCTGC       | TGGTCTGTGCCCATGTTAAGG     |
| <i>MnXERICO</i>   | AGATGACACCGAAAGCAACCG       | GTCCTCCTCGCAGCCACAC       |
| <i>MnNCED1</i>    | CCCGACGAAACTCCCCC           | TGGATTAGGACCCACCCGAA      |
| <i>MnCYCD3</i>    | AACAATAAGAGGAAGATAAACGAGGAA | GATGAGACAACGGACCAGGAAT    |
| <i>MnEXP2</i>     | GGGGCTTGCTACGAAATGC         | CTGAAGGAGACCGGGACGAT      |
| <i>MnCTRL9</i>    | GGCTATGTGATTTACCGTGTT       | TTGGTCCAGTATGAGTTGAGAA    |
| <i>AtACTIN7</i>   | CAGTGTCTGGATCGGAGGAT        | TGAACAATCGATGGACCTGA      |
| <i>AtFT</i>       | AATTGTCAGAGGGAGAGTGCC       | TAGGCATCATCACCGTTCGT      |
| <i>AtSOC1</i>     | GCTGAAGTTTCTCTTATCATC       | CCCAATGAACAATTGCGTCTC     |

---

58 **Supplementary Table S7.** Primers used for vector construction.

59

| Gene Name                         | Forward Primer (5'-3')              | Reverse Primer (5'-3')                  |
|-----------------------------------|-------------------------------------|-----------------------------------------|
| For gene clone                    |                                     |                                         |
| <i>MnMADS33</i>                   | ATGCGAATCAGACGATGCCAC               | TACTCAGAAAAGTCGCAGCAG                   |
| <i>MnMADS50</i>                   | ATGGGGAGAAAGAAGTTGGA                | TCAAGCGAACCATTGAATCA                    |
| <i>MnMADS7</i>                    | ATGGGGAGAAAGAAGGTGGAG               | TTATGACAATGTCTTATGGGATG                 |
| For <i>MnFT</i> promoter          |                                     |                                         |
| <i>MnFT-pro</i>                   | GGTTGTGGGAAGTGCGTACTC               | ACGACAAGAGGGTCTCTATCTCTAG               |
| For overexpression vectors        |                                     |                                         |
| <i>MnMADS33</i>                   | <b>GGTACC</b> ATGCGAATCAGACGATGCCAC | <b>GGATCC</b> TACTCAGAAAAGTCGCAGCAG     |
| <i>MnMADS50</i>                   | <b>GGTACC</b> ATGGGGAGAAAGAAGTTGGA  | <b>GGATCC</b> TCAAGCGAACCATTGAATCA      |
| <i>MnMADS7</i>                    | <b>GGTACC</b> ATGGGGAGAAAGAAGGTGGAG | <b>GGATCC</b> TTATGACAATGTCTTATGGGATG   |
| For yeast-two hybrid vectors      |                                     |                                         |
| <i>MnMADS33-AD</i>                | <b>GAATTC</b> ATGCGAATCAGACGATGCCAC | <b>GGATCC</b> TACTCAGAAAAGTCGCAGCAG     |
| <i>MnMADS50-AD</i>                | <b>GAATTC</b> ATGGGGAGAAAGAAGTTGGA  | <b>GGATCC</b> TCAAGCGAACCATTGAATCA      |
| <i>MnMADS7-AD</i>                 | <b>GAATTC</b> ATGGGGAGAAAGAAGGTGGAG | <b>GGATCC</b> TTATGACAATGTCTTATGGGATG   |
| <i>MnMADS1-AD</i>                 | <b>GAATTC</b> ATGGCGAGAGAGAAGATTCAG | <b>GGATCC</b> TCAGCCAGAGTATGGTAGCC      |
| For dual luciferase assay vectors |                                     |                                         |
| <i>MnFT</i>                       | <b>AAGCTT</b> GGTTGTGGGAAGTGCGTACTC | <b>GGATCC</b> ACGACAAGAGGGTCTCTATCTCTAG |
| <i>MnMADS33</i>                   | <b>GGATCC</b> ATGCGAATCAGACGATGCCAC | <b>GAATTC</b> TACTCAGAAAAGTCGCAGCAG     |
| <i>MnMADS50</i>                   | <b>GGATCC</b> ATGGGGAGAAAGAAGTTGGA  | <b>GAATTC</b> TCAAGCGAACCATTGAATCA      |
| <i>MnMADS7</i>                    | <b>GGATCC</b> ATGGGGAGAAAGAAGGTGGAG | <b>GAATTC</b> TTATGACAATGTCTTATGGGATG   |
| For subcellular vectors           |                                     |                                         |
| <i>MnMADS33</i>                   | <b>GGTACC</b> ATGCGAATCAGACGATGCCAC | <b>GGATCC</b> TCAGAAAAGTCGCAGCAG        |
| <i>MnMADS50</i>                   | <b>GGTACC</b> ATGGGGAGAAAGAAGTTGGA  | <b>GGATCC</b> AGCGAACCATTGAATCA         |

*MnMADS7*

*GGTACC*ATGGGGAGAAAGAAGGTGGAG

*GGATCCT*GACAATGTCTTATGGGATG

---

60

61 Red indicate the restriction sites.

62



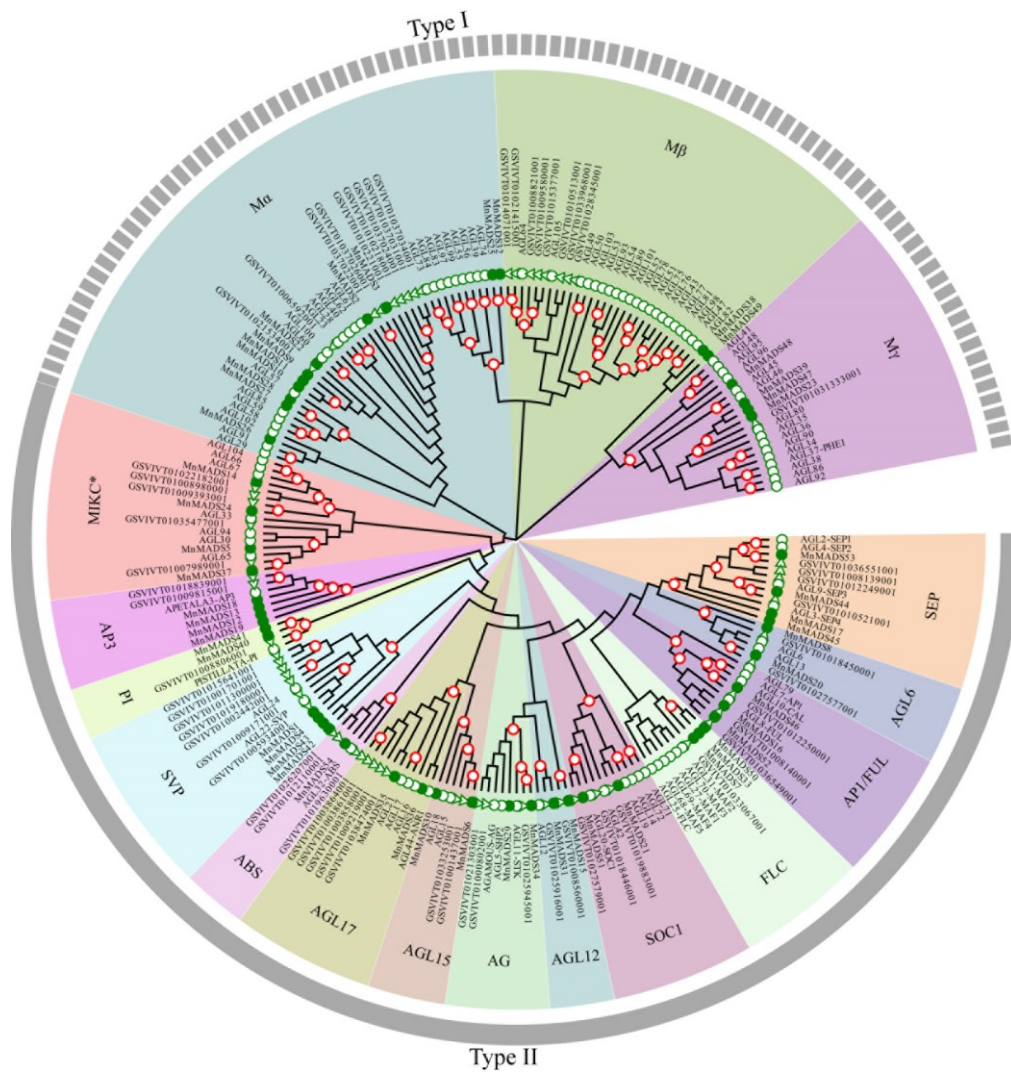

64

65 **Supplementary Figure S1.** Unrooted neighbor-joining tree is constructed using all full-length MADS-  
 66 box proteins from mulberry (filled green circle), grape (empty green triangle), and *Arabidopsis thaliana*  
 67 (empty green circle). Branches with more than 90% bootstrapping support are labeled with an empty red  
 68 circle. The MADS-box genes are divided into two groups (i.e., type I and type II). The main subgroups  
 69 in type II are indicated by a different background.

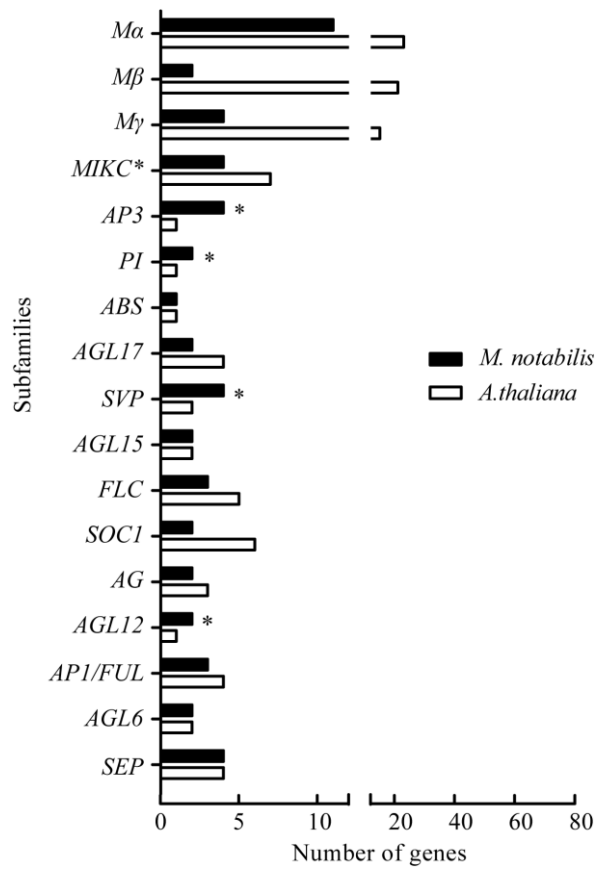

70

71 **Supplementary Figure S2.** Number of genes in MADS-box families/subfamilies in mulberry and *A.*  
 72 *thaliana*. For most families and subfamilies, there are more *A. thaliana* genes than mulberry genes. An  
 73 asterisk indicates a class B gene (*AP3* and *PI* subfamilies), *SVP*, and *AGL12* subfamily member.

74

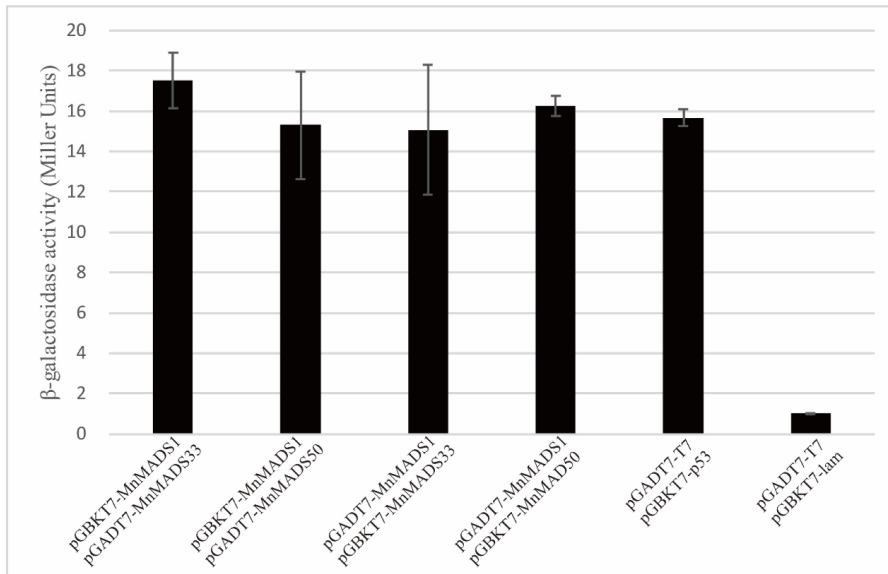

75  
76  
77  
78  
79

**Supplementary Figure S3.**  $\beta$ -galactosidase activity analysis. Three biological replicates were performed for the  $\beta$ -galactosidase activity analysis. (n = 3, mean  $\pm$  measurement range).

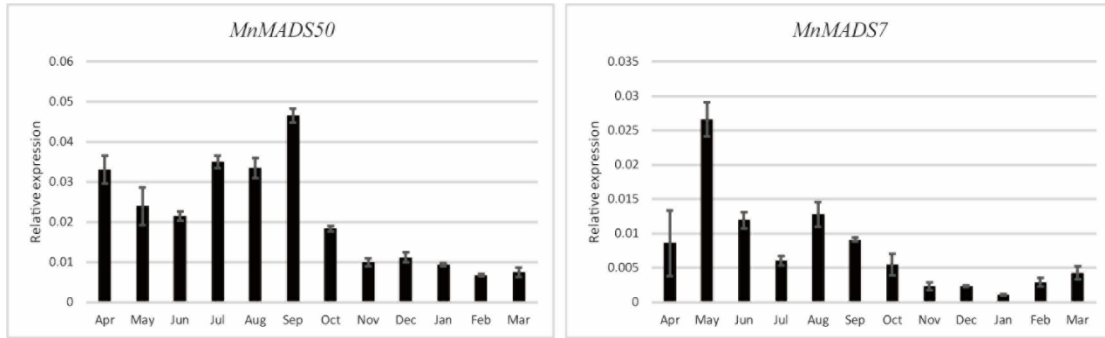

80

81 **Supplementary Figure S4.** Expression analyses of *MnMADS50* and *MnMADS7* in floral buds over one  
 82 year. Gene expression was measured by qRT-PCR using the *MnCTRL9* as a reference (n = 3, mean ±  
 83 measurement range).

84

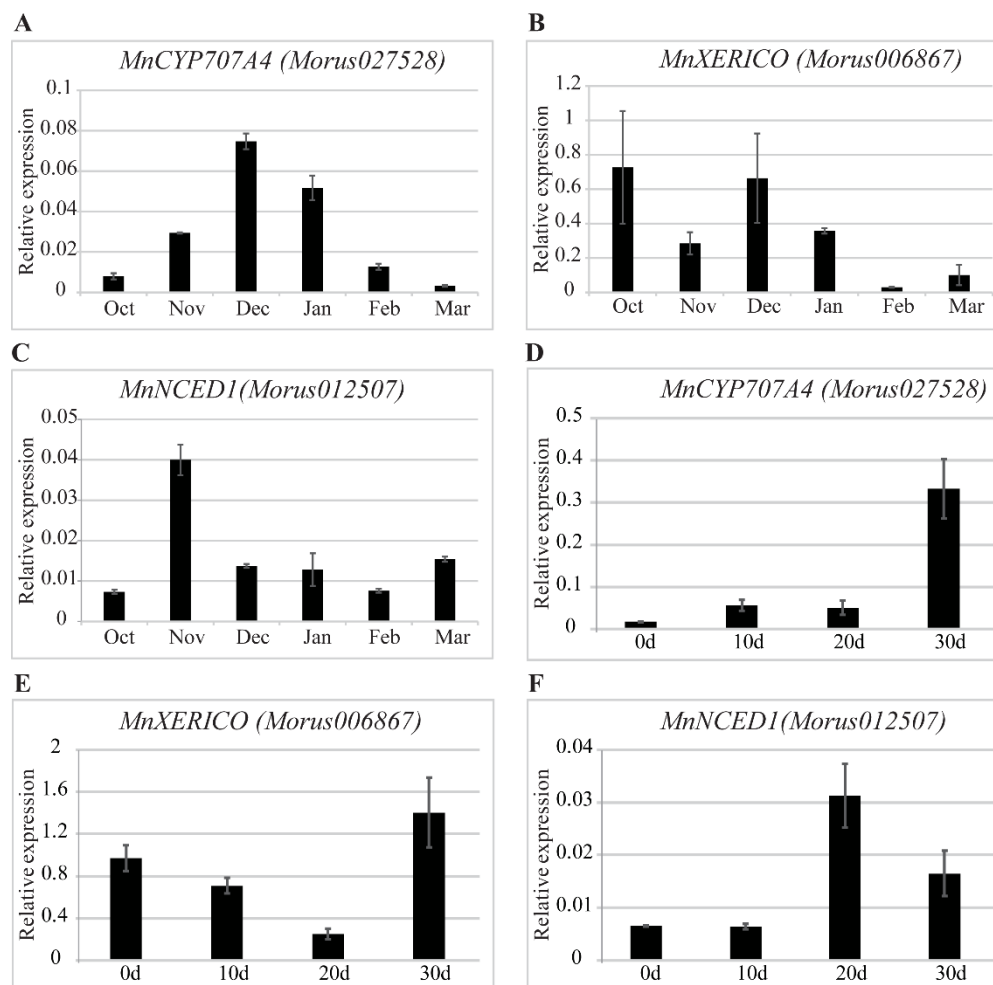

85

86 **Supplementary Figure S5.** Expression analyses of genes related to ABA biosynthesis and catabolism in  
 87 cold-treated mulberry floral buds under field and artificially controlled conditions. (A-C) Relative  
 88 expressions of *MnCYP707A4*, *MnXERICO*, and *MnNCED1* in floral buds for field sampling during  
 89 endodormancy. (D-F) Relative expressions of *MnCYP707A4*, *MnXERICO*, and *MnNCED1* in floral buds  
 90 under controlled cold condition. Gene expression was measured by qRT-PCR using the *MnCTRL9* as a  
 91 reference (n = 3, mean ± measurement range).

92

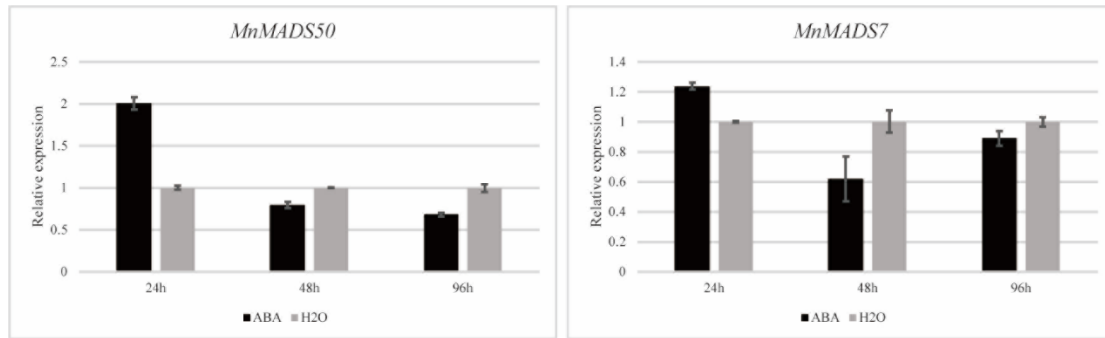

93

94 **Supplementary Figure S6.** Relative expressions of *MnMADS50* and *MnMADS7* in floral buds after  
 95 treatment for 24, 48, and 96 hours. Gene expression was measured by qRT-PCR using the *MnCTRL9* as  
 96 a reference (n = 3, mean ± measurement range).

97

98

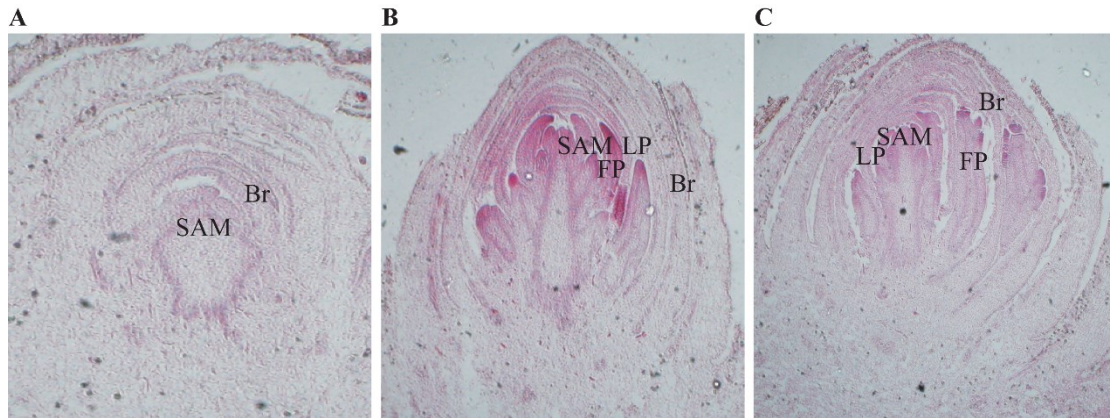

99

100 **Supplementary Figure S7.** Histology of mulberry buds. (A) Buds with undifferentiated inflorescence.  
 101 (B) Buds during initial differentiating inflorescence primordia. (C) Buds after differentiating  
 102 inflorescence primordia. *SAM*, *LP*, *Br*, and *FP* indicate the shoot apical meristem, leaf primordia, bract,  
 103 and flower primordia, respectively.

104
